# Supplementary material for: Estimated Vaccine Effectiveness for Respiratory Syncytial Virus–Related Lower Respiratory Tract Disease
Source: PubMed Central journal article supplement — JAMA Netw Open. 2024 Dec 13;7(12):e2450832. doi: 10.1001/jamanetworkopen.2024.50832 (PMC11645642; doi:10.1001/jamanetworkopen.2024.50832), 2024-12-13
Supplement: jamanetwopen-e2450832-s001.pdf [file jamanetwopen-e2450832-s001.pdf]

## Supplemental Online Content

Tartof SY, Aliabadi N, Goodwin G, et al. Estimated vaccine effectiveness and respiratory syncytial virus–related lower respiratory tract disease. *JAMA Netw Open*. 2024;7(12):e2450832. doi:10.1001/jamanetworkopen.2024.50832

**eTable 1.** Lower Respiratory Tract Disease Diagnosis Codes (*International Classification of Diseases, Tenth Revision [ICD-10] codes*)

**eTable 2.** LRTD *ICD-10* Code Distribution Between RSV-Positive Cases and RSV-Negative Controls Lower Respiratory Tract Disease Diagnosis Codes

**eTable 3.** Characteristics of Patients Aged 60 Years or Older With LRTD Inpatient or ED Encounters by RSV Testing Approach, Kaiser Permanente Southern California, November 2023 to April 2024

**eTable 4.** Characteristics of Patients Aged 60 Years or Older With LRTD Inpatient or ED Encounters by Vaccination Status, Kaiser Permanente Southern California, November 2023 to April 2024

**eReferences.**

This supplemental material has been provided by the authors to give readers additional information about their work.

**eTable 1. Lower Respiratory Tract Disease Diagnosis Codes (*International Classification of Diseases, Tenth Revision [ICD-10] codes*), Adapted From Rozenbaum et al<sup>1</sup>**

| Lower Respiratory Tract Disease (LRTD) |        |                                         |
|----------------------------------------|--------|-----------------------------------------|
| Value                                  |        | Description                             |
| <b>J09</b>                             | J09    | INFLUNZA D/T ID INFLUNZA VIRUS          |
|                                        | J09.X  | FLU D/T IDENT NOVEL FLU A VIRUS         |
|                                        | J09.X1 | FLU D/T ID NOVEL FLU A VIRUS W PN       |
|                                        | J09.X2 | FLU D/T IDENT NVL FLU A VIRUS W/RES     |
|                                        | J09.X3 | FLU D/T IDENT NVL FLU A VIRUS W/GI      |
|                                        | J09.X9 | FLU D/T IDENT NVL FLU A VIRUS WOTH      |
| <b>J10</b>                             | J10    | INFLUENZA D/T OTHR IDENT FLU VIRUS      |
|                                        | J10.0  | INFLU D/T OTH IDENT FLU W/PNEUMONIA     |
|                                        | J10.00 | FLU D/T OTH ID FLU VIRUS W UNSP TYPE PN |
|                                        | J10.01 | INFLU D/T OTH IDENT FLU W/SAM OT PN     |
|                                        | J10.08 | FLU D/T OTH ID FLU VIRUS W OTH SPEC PN  |
|                                        | J10.1  | INFLUENZA D/T OTHR FLU VIRUS W/RESP     |
|                                        | J10.2  | FLU D/T OTH ID FLU VIRUS W GI MANIFEST  |
|                                        | J10.8  | INFLUENZA D/T OTHR FLU WOTHR MANI       |
|                                        | J10.81 | FLU D/T OTH IDNTF FLU VI W/ENCEPHAP     |
|                                        | J10.82 | FLU D/T OTH ID FLU VIRUS W MYOCARDITIS  |
|                                        | J10.83 | FLU D/T OTH ID FLU VIRUS W OTITIS MEDIA |
|                                        | J10.89 | FLU D/T OTH ID FLU VIRUS W OTH MANIFEST |
| <b>J11</b>                             | J11    | INFLUENZA D/T UNIDENT FLU VIRUS         |
|                                        | J11.0  | INFLU D/T UNIDENT FLU WTH PNEUMONIA     |
|                                        | J11.00 | FLU D/T UNID FLU VIRUS W UNSP TYPE PN   |
|                                        | J11.08 | FLU D/T UNID FLU VIRUS W SPEC PN        |
|                                        | J11.1  | INFLU D/T UNIDNT FLU VRS WOTH RESP      |
|                                        | J11.2  | FLU D/T UNID FLU VIRUS W GI MANIFEST    |
|                                        | J11.8  | INFLU D/T UNIDNT FLU VRS WOTH MANF      |
|                                        | J11.81 | FLU D/T UNID FLU VIRUS W ENCEPHALOPATHY |
|                                        | J11.82 | FLU D/T UNID FLU VIRUS W MYOCARDITIS    |

| Lower Respiratory Tract Disease (LRTD) |         |                                       |
|----------------------------------------|---------|---------------------------------------|
| Value                                  |         | Description                           |
|                                        | J11.83  | FLU D/T UNID FLU VIRUS W OTITIS MEDIA |
|                                        | J11.89  | FLU D/T UNID FLU VIRUS W OTH MANIFEST |
| <b>J12</b>                             | J12     | VIRAL PNEUMONIA, NEC                  |
|                                        | J12.0   | ADENOVIRAL PN                         |
|                                        | J12.1   | RESP SYNCYTIAL VIRUS PN               |
|                                        | J12.2   | PARAINFLUENZA VIRUS PN                |
|                                        | J12.3   | HUMAN METAPNEUMOVIRUS PN              |
|                                        | J12.8   | OTH VIRAL PNEUMONIA                   |
|                                        | J12.81  | PN D/T SARS-ASSOC CORONAVIRUS         |
|                                        | J12.82  | PN D/T CORONAVIRUS DISEASE 2019       |
|                                        | J12.89  | OTH VIRAL PN                          |
|                                        | J12.9   | VIRAL PN UNSP                         |
| <b>J13</b>                             | J13     | PN D/T STREPTOCOCCUS PNE              |
| <b>J14</b>                             | J14     | PN D/T HEMOPHILUS INFLUENZAE          |
| <b>J15</b>                             | J15     | BACTERIAL PNEUMONIA NEC               |
|                                        | J15.0   | PN D/T KLEBSIELLA PNE                 |
|                                        | J15.1   | PN D/T PSEUDOMONAS                    |
|                                        | J15.2   | PNEUMONIA DUE TO STAPHYLOCOCCUS       |
|                                        | J15.20  | PN D/T STAPH UNSP                     |
|                                        | J15.21  | PNEUMONIA D/T STAPH AUREUS            |
|                                        | J15.211 | PN D/T METHCIL SUSCEPT STAPH AURS     |
|                                        | J15.212 | PN D/T METHCIL RESISTANT STAPH AURS   |
|                                        | J15.29  | PN D/T OTH STAPH                      |
|                                        | J15.3   | PN D/T STREPTOCOCCUS GRP B            |
|                                        | J15.4   | PN D/T OTH STREPTOCOCCI               |
|                                        | J15.5   | PN D/T ESCHERICHIA COLI               |
|                                        | J15.6   | PN D/T OTH GRAM-NEGATIVE BACTERIA     |
|                                        | J15.7   | PN D/T MYCOPLASMA PNE                 |
|                                        | J15.8   | PN D/T OTH SPEC BACTERIA              |

| Lower Respiratory Tract Disease (LRTD) |       |                                       |
|----------------------------------------|-------|---------------------------------------|
| Value                                  |       | Description                           |
|                                        | J15.9 | UNSP BACTERIAL PN                     |
| <b>J16</b>                             | J16   | PNEUMONIA D/T OTH INFCT ORGANS NEC    |
|                                        | J16.0 | CHLAMYIAL PN                          |
|                                        | J16.8 | PN D/T OTH SPEC INFCT ORGISMS         |
| <b>J17</b>                             | J17   | PN IN DZ CLS ELSWHR                   |
| <b>J18</b>                             | J18   | PNEUMONIA, UNSP ORGANISM              |
|                                        | J18.0 | BRONCHOPN UNSP ORGISM                 |
|                                        | J18.1 | LOBAR PN UNSP ORGISM                  |
|                                        | J18.8 | OTH PN UNSP ORGISM                    |
|                                        | J18.9 | PN UNSP ORGISM                        |
| <b>J20</b>                             | J20   | ACUTE BRONCHITIS                      |
|                                        | J20.0 | AC BRONCHIT D/T MYCOPLASMA PNE        |
|                                        | J20.1 | AC BRONCHIT D/T HEMOPHILUS INFLUENZAE |
|                                        | J20.2 | AC BRONCHIT D/T STREPTOCOCCUS         |
|                                        | J20.3 | AC BRONCHIT D/T COXSACKIEVIRUS        |
|                                        | J20.4 | AC BRONCHIT D/T PARAINFLUENZA VIRUS   |
|                                        | J20.5 | AC BRONCHIT D/T RESP SYNCYTIAL VIRUS  |
|                                        | J20.6 | AC BRONCHIT D/T RHINOVIRUS            |
|                                        | J20.7 | AC BRONCHIT D/T ECHOVIRUS             |
|                                        | J20.8 | AC BRONCHIT D/T OTH SPEC ORGISMS      |
|                                        | J20.9 | AC BRONCHIT UNSP                      |
| <b>J21</b>                             | J21   | ACUTE BRONCHIOLITIS                   |
|                                        | J21.0 | AC BRONCHIO D/T RESP SYNCYTIAL VIRUS  |
|                                        | J21.1 | AC BRONCHIO D/T HUMAN METAPNEUMOVIRUS |
|                                        | J21.8 | AC BRONCHIO D/T OTH SPEC ORGISMS      |
|                                        | J21.9 | AC BRONCHIO UNSP                      |
| <b>J22</b>                             | J22   | UNSP AC LO RESP INFCT                 |
| <b>J44.0</b>                           | J44   | OTHR CHR OBSTR PULMONARY DZ           |
|                                        | J44.0 | CHRON OBSTR PULM DZ W/AC LO RESP      |

| Lower Respiratory Tract Disease (LRTD) |             |                                                        |
|----------------------------------------|-------------|--------------------------------------------------------|
| Value                                  | Description |                                                        |
|                                        | J44.1       | CHRON OBSTR PULM DZ W/EXACERBATION                     |
|                                        | J44.9       | CHR OBSTRUCTIVE PULM DZ UNSP                           |
| <b>J45</b>                             | J45.21      | Asthma with (acute) exacerbation                       |
|                                        | J45.22      | Asthma with status asthmaticus                         |
|                                        | J45.31      | Mild persistent asthma with (acute) exacerbation       |
|                                        | J45.32      | Mild persistent asthma with status asthmaticus         |
|                                        | J45.41      | Moderate persistent asthma with (acute) exacerbation   |
|                                        | J45.42      | Moderate persistent asthma with status asthmaticus     |
|                                        | J45.51      | Severe persistent asthma with (acute) exacerbation     |
|                                        | J45.52      | Severe persistent asthma with status asthmaticus       |
|                                        | J45.901     | Other and unspecified asthma with (acute) exacerbation |
|                                        | J45.902     | Other and unspecified asthma with status asthmaticus   |
| <b>J85.x</b>                           | J85         | ABSCESS OF LUNG AND MEDIASTINUM                        |
|                                        | J85.0       | GANGR&NECR LUNG                                        |
|                                        | J85.1       | ABCS LUNG W PN                                         |
|                                        | J85.2       | ABCS LUNG WO PN                                        |
|                                        | J85.3       | ABCS MEDIASTINUM                                       |
| <b>J86.x</b>                           | J86         | PYOTHRX                                                |
|                                        | J86.0       | PYOTHRX W FISTULA                                      |
|                                        | J86.9       | PYOTHRX WO FISTULA                                     |

**eTable 2. LRTD ICD-10 Code Distribution Between RSV-Positive Cases and RSV-Negative Controls**

| LRTD ICD-10 Code | Code Description                                       | RSV negative | RSV positive | Total |
|------------------|--------------------------------------------------------|--------------|--------------|-------|
| <b>J18.9</b>     | PN UNSP ORGISM                                         | 2,897        | 168          | 3,065 |
| <b>J44.1</b>     | CHRON OBSTR PULM DZ W/EXACERBATION                     | 990          | 101          | 1,091 |
| <b>J44.9</b>     | CHR OBSTRUCTIVE PULM DZ UNSP                           | 1,003        | 51           | 1,054 |
| <b>J44.0</b>     | CHRON OBSTR PULM DZ W/AC LO RESP                       | 844          | 85           | 929   |
| <b>J45.901</b>   | Other and unspecified asthma with (acute) exacerbation | 355          | 56           | 411   |
| <b>J44.89</b>    | CHRONIC OBSTRUCTIVE ASTHMA W STATUS ASTHMATICUS        | 255          | 18           | 273   |

|                |                                                      |     |     |     |
|----------------|------------------------------------------------------|-----|-----|-----|
| <b>J12.82</b>  | PN D/T CORONAVIRUS DISEASE 2019                      | 226 | 3   | 229 |
| <b>J15.9</b>   | UNSPECIFIED BACTERIAL PNEUMONIA                      | 205 | 21  | 226 |
| <b>J20.9</b>   | AC BRONCHIT UNSP                                     | 169 | 26  | 195 |
| <b>J12.1</b>   | RESP SYNCYTIAL VIRUS PN                              | 16  | 156 | 172 |
| <b>J10.1</b>   | INFLUENZA D/T OTHR FLU VIRUS W/RESP                  | 140 | 6   | 146 |
| <b>J18.1</b>   | LOBAR PN UNSP ORGISM                                 | 118 | 7   | 125 |
| <b>J11.1</b>   | INFLU D/T UNIDNT FLU VRS WOTH RESP                   | 117 | 7   | 124 |
| <b>J45.41</b>  | Moderate persistent asthma with (acute) exacerbation | 89  | 11  | 100 |
| <b>J20.5</b>   | AC BRONCHIT D/T RESP SYNCYTIAL VIRUS                 | 4   | 77  | 81  |
| <b>J45.21</b>  | Asthma with (acute) exacerbation                     | 67  | 14  | 81  |
| <b>J15.1</b>   | PN D/T PSEUDOMONAS                                   | 76  | 4   | 80  |
| <b>J12.89</b>  | OTH VIRAL PN                                         | 78  | 0   | 78  |
| <b>J45.31</b>  | Mild persistent asthma with (acute) exacerbation     | 61  | 14  | 75  |
| <b>J12.9</b>   | VIRAL PN UNSP                                        | 61  | 5   | 66  |
| <b>J12.3</b>   | HUMAN METAPNEUMOVIRUS PN                             | 56  | 0   | 56  |
| <b>J20.8</b>   | AC BRONCHIT D/T OTH SPEC ORGISMS                     | 54  | 1   | 55  |
| <b>J10.00</b>  | FLU D/T OTH ID FLU VIRUS W UNSP TYPE PN              | 53  | 1   | 54  |
| <b>J13</b>     | PN D/T STREPTOCOCCUS PNE                             | 27  | 10  | 37  |
| <b>J86.9</b>   | PYOTHRX WO FISTULA                                   | 36  | 1   | 37  |
| <b>J15.69</b>  | PNEUMONIA DUE TO OTHER GRAM-NEGATIVE BACTERIA        | 34  | 0   | 34  |
| <b>J45.51</b>  | Severe persistent asthma with (acute) exacerbation   | 27  | 7   | 34  |
| <b>J15.4</b>   | PN D/T OTH STREPTOCOCCI                              | 28  | 5   | 33  |
| <b>J20.6</b>   | AC BRONCHIT D/T RHINOVIRUS                           | 29  | 2   | 31  |
| <b>J15.0</b>   | PN D/T KLEBSIELLA PNE                                | 29  | 0   | 29  |
| <b>J18.8</b>   | OTH PN UNSP ORGISM                                   | 28  | 1   | 29  |
| <b>J18.0</b>   | BRONCHOPN UNSP ORGISM                                | 23  | 5   | 28  |
| <b>J10.08</b>  | FLU D/T OTH ID FLU VIRUS W OTH SPEC PN               | 26  | 1   | 27  |
| <b>J16.8</b>   | PN D/T OTH SPEC INFCT ORGISMS                        | 26  | 1   | 27  |
| <b>J11.00</b>  | FLU D/T UNID FLU VIRUS W UNSP TYPE PN                | 25  | 1   | 26  |
| <b>J15.212</b> | PN D/T METHCIL RESISTANT STAPH AURS                  | 23  | 1   | 24  |
| <b>J15.211</b> | PN D/T METHCIL SUSCEPT STAPH AURS                    | 22  | 1   | 23  |
| <b>J10.01</b>  | INFLU D/T OTH IDENT FLU W/SAM OT PN                  | 18  | 0   | 18  |
| <b>J85.1</b>   | ABCS LUNG W PN                                       | 16  | 1   | 17  |
| <b>J21.0</b>   | AC BRONCHIO D/T RESP SYNCYTIAL VIRUS                 | 3   | 11  | 14  |
| <b>J21.9</b>   | AC BRONCHIO UNSP                                     | 13  | 1   | 14  |
| <b>J85.0</b>   | GANGR&NECR LUNG                                      | 13  | 0   | 13  |
| <b>J20.4</b>   | AC BRONCHIT D/T PARAINFLUENZA VIRUS                  | 12  | 0   | 12  |
| <b>J12.2</b>   | PARAINFLUENZA VIRUS PN                               | 10  | 0   | 10  |
| <b>J14</b>     | PN D/T HEMOPHILUS INFLUENZAE                         | 10  | 0   | 10  |

|                |                                                      |       |     |       |
|----------------|------------------------------------------------------|-------|-----|-------|
| <b>J15.7</b>   | PNEUMONIA DUE TO MYCOPLASMA PNEUMONIAE               | 9     | 0   | 9     |
| <b>J22</b>     | UNSP AC LO RESP INFCT                                | 5     | 4   | 9     |
| <b>J11.08</b>  | FLU D/T UNID FLU VIRUS W SPEC PN                     | 8     | 0   | 8     |
| <b>J15.5</b>   | PN D/T ESCHERICHIA COLI                              | 8     | 0   | 8     |
| <b>J09.X1</b>  | FLU D/T ID NOVEL FLU A VIRUS W PN                    | 7     | 0   | 7     |
| <b>J86.0</b>   | PYOTHRX W FISTULA                                    | 7     | 0   | 7     |
| <b>J85.2</b>   | ABCS LUNG WO PN                                      | 6     | 0   | 6     |
| <b>J09.X2</b>  | FLU D/T IDENT NVL FLU A VIRUS W/RES                  | 4     | 1   | 5     |
| <b>J15.8</b>   | PNEUMONIA DUE TO OTHER SPECIFIED BACTERIA            | 5     | 0   | 5     |
| <b>J12.0</b>   | ADENOVIRAL PN                                        | 3     | 1   | 4     |
| <b>J15.61</b>  | PNEUMONIA DUE TO ACINETOBACTER BAUMANNII             | 3     | 0   | 3     |
| <b>J21.8</b>   | AC BRONCHIO D/T OTH SPEC ORGISMS                     | 3     | 0   | 3     |
| <b>J44.81</b>  | BRONCHIOLITIS OBLITERANS AND SYNDROME                | 3     | 0   | 3     |
| <b>J45.902</b> | Other and unspecified asthma with status asthmaticus | 2     | 1   | 3     |
| <b>J12.81</b>  | PN D/T SARS-ASSOC CORONAVIRUS                        | 2     | 0   | 2     |
| <b>J15.3</b>   | PN D/T STREPTOCOCCUS GRP B                           | 2     | 0   | 2     |
| <b>J18.2</b>   | HYPOSTATIC PNEUMONIA, UNSPECIFIED ORGANISM           | 2     | 0   | 2     |
| <b>J21.1</b>   | AC BRONCHIO D/T HUMAN METAPNEUMOVIRUS                | 2     | 0   | 2     |
| <b>J09.X3</b>  | FLU D/T IDENT NVL FLU A VIRUS W/GI                   | 1     | 0   | 1     |
| <b>J09.X9</b>  | FLU D/T IDENT NVL FLU A VIRUS WOTH                   | 1     | 0   | 1     |
| <b>J10.2</b>   | FLU D/T OTH ID FLU VIRUS W GI MANIFEST               | 1     | 0   | 1     |
| <b>J15.20</b>  | PN D/T STAPH UNSP                                    | 1     | 0   | 1     |
| <b>J15.29</b>  | PN D/T OTH STAPH                                     | 1     | 0   | 1     |
| <b>J16.0</b>   | CHLAMYIAL PN                                         | 1     | 0   | 1     |
| <b>J45.42</b>  | Moderate persistent asthma with status asthmaticus   | 1     | 0   | 1     |
| <b>J45.52</b>  | Severe persistent asthma with status asthmaticus     | 1     | 0   | 1     |
| <b>Total</b>   |                                                      | 8,501 | 888 | 9,389 |

**eTable 3. Characteristics of Patients Aged 60 Years or Older With LRTD Inpatient or ED Encounters by RSV Testing Approach, Kaiser Permanente Southern California, November 2023 to April 2024**

| Characteristic                                                      | Total Study Population – Tested for RSV | No swab collected/Not Tested for RSV | p-value* | KPSC Standard of Care RSV Testing | Enhanced Salvaged Specimen RSV Testing | p-value** |
|---------------------------------------------------------------------|-----------------------------------------|--------------------------------------|----------|-----------------------------------|----------------------------------------|-----------|
|                                                                     | <b>N=7,047</b>                          | <b>N=4,927</b>                       |          | <b>N=725</b>                      | <b>N=6,322</b>                         |           |
| <b>Age at index date</b>                                            |                                         |                                      | 0.2019   |                                   |                                        | 0.1000    |
| 60-74                                                               | 3001 (42.6%)                            | 2156 (43.8%)                         |          | 288 (39.7%)                       | 2713 (42.9%)                           |           |
| 75+                                                                 | 4046 (57.4%)                            | 2771 (56.2%)                         |          | 437 (60.3%)                       | 3609 (57.1%)                           |           |
| <b>Sex</b>                                                          |                                         |                                      | <.0001   |                                   |                                        | 0.5764    |
| Female                                                              | 3819 (54.2%)                            | 2378 (48.3%)                         |          | 400 (55.2%)                       | 3419 (54.1%)                           |           |
| Male                                                                | 3228 (45.8%)                            | 2244 (45.5%)                         |          | 325 (44.8%)                       | 2903 (45.9%)                           |           |
| Unknown                                                             | --                                      | 305 (6.2%)                           |          | --                                | --                                     |           |
| <b>Months of encounter</b>                                          |                                         |                                      | <.0001   |                                   |                                        | <.0001    |
| Nov-Dec                                                             | 2275 (32.3%)                            | 1827 (37.1%)                         |          | 135 (18.6%)                       | 2140 (33.9%)                           |           |
| Jan-Feb                                                             | 3733 (53.0%)                            | 1244 (25.2%)                         |          | 441 (60.8%)                       | 3292 (52.1%)                           |           |
| Mar-Apr                                                             | 1039 (14.7%)                            | 1856 (37.7%)                         |          | 149 (20.6%)                       | 890 (14.1%)                            |           |
| <b>Race/ethnicity</b>                                               |                                         |                                      | <.0001   |                                   |                                        | <.0001    |
| Non-Hispanic Asian/Pacific Islander                                 | 839 (11.9%)                             | 565 (11.5%)                          |          | 88 (12.1%)                        | 751 (11.9%)                            |           |
| Non-Hispanic Black                                                  | 1197 (17.0%)                            | 902 (18.3%)                          |          | 185 (25.5%)                       | 1012 (16.0%)                           |           |
| Hispanic                                                            | 2323 (33.0%)                            | 1471 (29.9%)                         |          | 238 (32.8%)                       | 2085 (33.0%)                           |           |
| Non-Hispanic Multiple/Other/Unknown                                 | 86 (1.2%)                               | 372 (7.6%)                           |          | 5 (0.7%)                          | 81 (1.3%)                              |           |
| Non-Hispanic White                                                  | 2602 (36.9%)                            | 1617 (32.8%)                         |          | 209 (28.8%)                       | 2393 (37.9%)                           |           |
| <b>Modified Charlson Index Score</b>                                |                                         |                                      | <.0001   |                                   |                                        | 0.0001    |
| 0                                                                   | 474 (6.7%)                              | 682 (13.8%)                          |          | 27 (3.7%)                         | 447 (7.1%)                             |           |
| 1                                                                   | 660 (9.4%)                              | 456 (9.3%)                           |          | 51 (7.0%)                         | 609 (9.6%)                             |           |
| 2                                                                   | 856 (12.1%)                             | 604 (12.3%)                          |          | 82 (11.3%)                        | 774 (12.2%)                            |           |
| 3+                                                                  | 5057 (71.8%)                            | 3185 (64.6%)                         |          | 565 (77.9%)                       | 4492 (71.1%)                           |           |
| <b>Number of inpatient encounters in the year before index date</b> |                                         |                                      | <.0001   |                                   |                                        | 0.0050    |
| 0                                                                   | 4331 (61.5%)                            | 3310 (67.2%)                         |          | 407 (56.1%)                       | 3924 (62.1%)                           |           |
| 1                                                                   | 1432 (20.3%)                            | 901 (18.3%)                          |          | 160 (22.1%)                       | 1272 (20.1%)                           |           |
| 2+                                                                  | 1284 (18.2%)                            | 716 (14.5%)                          |          | 158 (21.8%)                       | 1126 (17.8%)                           |           |
| <b>Number of ED encounters in the year before index date</b>        |                                         |                                      | <.0001   |                                   |                                        | 0.0451    |
| 0                                                                   | 2698 (38.3%)                            | 2058 (41.8%)                         |          | 270 (37.2%)                       | 2428 (38.4%)                           |           |
| 1                                                                   | 1668 (23.7%)                            | 1193 (24.2%)                         |          | 151 (20.8%)                       | 1517 (24.0%)                           |           |



|                                                                      |              |              |        |             |              |        |
|----------------------------------------------------------------------|--------------|--------------|--------|-------------|--------------|--------|
| 2+                                                                   | 2681 (38.0%) | 1676 (34.0%) |        | 304 (41.9%) | 2377 (37.6%) |        |
| <b>Number of outpatient encounters in the year before index date</b> |              |              | <.0001 |             |              | 0.5857 |
| <10                                                                  | 2250 (31.9%) | 2973 (60.3%) |        | 225 (31.0%) | 2025 (32.0%) |        |
| 10+                                                                  | 4797 (68.1%) | 1954 (39.7%) |        | 500 (69.0%) | 4297 (68.0%) |        |
| <b>Comorbidities</b>                                                 |              |              |        |             |              |        |
| Myocardial infarction                                                | 1126 (16.0%) | 702 (14.2%)  | 0.0096 | 123 (17.0%) | 1003 (15.9%) | 0.4438 |
| Congestive heart failure                                             | 2602 (36.9%) | 1565 (31.8%) | <.0001 | 298 (41.1%) | 2304 (36.4%) | 0.0138 |
| Cerebrovascular disease                                              | 1016 (14.4%) | 716 (14.5%)  | 0.8606 | 124 (17.1%) | 892 (14.1%)  | 0.0297 |
| Peripheral vascular disease                                          | 4823 (68.4%) | 3097 (62.9%) | <.0001 | 517 (71.3%) | 4306 (68.1%) | 0.0792 |
| Moderate or severe liver disease                                     | 120 (1.7%)   | 69 (1.4%)    | 0.1914 | 18 (2.5%)   | 102 (1.6%)   | 0.0866 |
| Malignancy                                                           | 1219 (17.3%) | 786 (16.0%)  | 0.0524 | 146 (20.1%) | 1073 (17.0%) | 0.0328 |
| Renal disease                                                        | 2990 (42.4%) | 1817 (36.9%) | <.0001 | 334 (46.1%) | 2656 (42.0%) | 0.0363 |
| COPD                                                                 | 3518 (49.9%) | 2702 (54.8%) | <.0001 | 445 (61.4%) | 3073 (48.6%) | <.0001 |
| Dementia                                                             | 851 (12.1%)  | 560 (11.4%)  | 0.2356 | 109 (15.0%) | 742 (11.7%)  | 0.0099 |
| AIDS/HIV                                                             | 23 (0.3%)    | 19 (0.4%)    | 0.5894 | 6 (0.8%)    | 17 (0.3%)    | 0.0125 |
| <b>Diabetes</b>                                                      |              |              | <.0001 |             |              | 0.0433 |
| Diabetes with A1c $\geq$ 7.5                                         | 1098 (15.6%) | 659 (13.4%)  |        | 108 (14.9%) | 990 (15.7%)  |        |
| Diabetes with A1c<7.5                                                | 2398 (34.0%) | 1473 (29.9%) |        | 280 (38.6%) | 2118 (33.5%) |        |
| Diabetes with unknown A1c                                            | 152 (2.2%)   | 134 (2.7%)   |        | 12 (1.7%)   | 140 (2.2%)   |        |
| No diabetes diagnosis                                                | 3399 (48.2%) | 2661 (54.0%) |        | 325 (44.8%) | 3074 (48.6%) |        |
| <b>RSV Result</b>                                                    |              |              | N/A    |             |              | 0.0005 |
| Negative                                                             | 6424 (91.2%) | N/A          |        | 686 (94.6%) | 5738 (90.8%) |        |
| Positive                                                             | 623 (8.8%)   | N/A          |        | 39 (5.4%)   | 584 (9.2%)   |        |
| <b>Encounter setting</b>                                             |              |              | <.0001 |             |              | <.0001 |
| Hospitalization                                                      | 4024 (57.1%) | 2575 (52.3%) |        | 482 (66.5%) | 3542 (56.0%) |        |
| Emergency Department                                                 | 3023 (42.9%) | 2352 (47.7%) |        | 243 (33.5%) | 2780 (44.0%) |        |
| <b>Immunocompromised</b>                                             |              |              | <.0001 |             |              | 0.7635 |
| No                                                                   | 6049 (85.8%) | 4372 (88.7%) |        | 625 (86.2%) | 5424 (85.8%) |        |
| Yes                                                                  | 998 (14.2%)  | 555 (11.3%)  |        | 100 (13.8%) | 898 (14.2%)  |        |
| <b>Abrysvo vaccination status</b>                                    |              |              | 0.0077 |             |              | <.0001 |
| Did not receive ABRYSVO vaccine                                      | 6824 (96.8%) | 4726 (95.9%) |        | 680 (93.8%) | 6144 (97.2%) |        |
| Received ABRYSVO vaccine                                             | 223 (3.2%)   | 201 (4.1%)   |        | 45 (6.2%)   | 178 (2.8%)   |        |

\*p-value calculated using chi-square, compares characteristics of total RSV tested population versus non-tested population (the latter includes those with no specimen collected)

\*\*p-value calculated using chi-square, compares RSV standard of care testing versus RSV salvage testing

**eTable 4. Characteristics of Patients Aged 60 Years or Older With LRTD Inpatient or ED Encounters by Vaccination Status, Kaiser Permanente Southern California, November 2023 to April 2024**

| Characteristic                                                      | 'Strict Analysis' Unvaccinated N=1,396 | 'Strict Analysis' Vaccinated N=31 | 'Strict' p-value | 'Broad Analysis' Unvaccinated N=6,824 | 'Broad Analysis' Vaccinated N=223 | 'Broad Analysis' p-value |
|---------------------------------------------------------------------|----------------------------------------|-----------------------------------|------------------|---------------------------------------|-----------------------------------|--------------------------|
| <b>Age at index date</b>                                            |                                        |                                   |                  |                                       |                                   |                          |
| 60-74                                                               | 627 (44.9%)                            | 12 (38.7%)                        | 0.492            | 2936 (43%)                            | 65 (29.1%)                        | <0.0001                  |
| 75+                                                                 | 769 (55.1%)                            | 19 (61.3%)                        |                  | 3888 (57%)                            | 158 (70.9%)                       |                          |
| <b>Sex</b>                                                          |                                        |                                   |                  |                                       |                                   |                          |
| Female                                                              | 799 (57.2%)                            | 17 (54.8%)                        | 0.7897           | 3704 (54.3%)                          | 115 (51.6%)                       | 0.4242                   |
| Male                                                                | 597 (42.8%)                            | 14 (45.2%)                        |                  | 3120 (45.7%)                          | 108 (48.4%)                       |                          |
| <b>Months of encounter</b>                                          |                                        |                                   |                  |                                       |                                   |                          |
| Nov-Dec                                                             | 504 (36.1%)                            | 1 (3.2%)                          | 0.0006           | 2254 (33%)                            | 21 (9.4%)                         | <0.0001                  |
| Jan-Feb                                                             | 700 (50.1%)                            | 22 (71%)                          |                  | 3587 (52.6%)                          | 146 (65.5%)                       |                          |
| Mar-Apr                                                             | 192 (13.8%)                            | 8 (25.8%)                         |                  | 983 (14.4%)                           | 56 (25.1%)                        |                          |
| <b>Race/ethnicity</b>                                               |                                        |                                   |                  |                                       |                                   |                          |
| Non-Hispanic Asian/Pacific Islander                                 | 188 (13.5%)                            | 5 (16.1%)                         | 0.2413           | 796 (11.7%)                           | 43 (19.3%)                        | 0.0001                   |
| Non-Hispanic Black                                                  | 182 (13%)                              | 6 (19.4%)                         |                  | 1158 (17%)                            | 39 (17.5%)                        |                          |
| Hispanic                                                            | 529 (37.9%)                            | 6 (19.4%)                         |                  | 2275 (33.3%)                          | 48 (21.5%)                        |                          |
| Non-Hispanic Multiple/Other/Unknown                                 | 23 (1.6%)                              | 0 (0%)                            |                  | 86 (1.3%)                             | 0 (0%)                            |                          |
| Non-Hispanic White                                                  | 474 (34%)                              | 14 (45.2%)                        |                  | 2509 (36.8%)                          | 93 (41.7%)                        |                          |
| <b>Modified Charlson Index Score</b>                                |                                        |                                   |                  |                                       |                                   |                          |
| 0                                                                   | 110 (7.9%)                             | 1 (3.2%)                          | 0.5553           | 465 (6.8%)                            | 9 (4%)                            | 0.0643                   |
| 1                                                                   | 152 (10.9%)                            | 4 (12.9%)                         |                  | 641 (9.4%)                            | 19 (8.5%)                         |                          |
| 2                                                                   | 177 (12.7%)                            | 6 (19.4%)                         |                  | 818 (12%)                             | 38 (17%)                          |                          |
| 3+                                                                  | 957 (68.6%)                            | 20 (64.5%)                        |                  | 4900 (71.8%)                          | 157 (70.4%)                       |                          |
| <b>Number of inpatient encounters in the year before index date</b> |                                        |                                   |                  |                                       |                                   |                          |
| 0                                                                   | 976 (69.9%)                            | 22 (71%)                          | 0.7847           | 4184 (61.3%)                          | 147 (65.9%)                       | 0.3723                   |
| 1                                                                   | 231 (16.5%)                            | 6 (19.4%)                         |                  | 1391 (20.4%)                          | 41 (18.4%)                        |                          |
| 2+                                                                  | 189 (13.5%)                            | 3 (9.7%)                          |                  | 1249 (18.3%)                          | 35 (15.7%)                        |                          |
| <b>Number of ED encounters in the year before index date</b>        |                                        |                                   |                  |                                       |                                   |                          |
| 0                                                                   | 588 (42.1%)                            | 13 (41.9%)                        | 0.976            | 2597 (38.1%)                          | 101 (45.3%)                       | 0.0144                   |
| 1                                                                   | 335 (24%)                              | 7 (22.6%)                         |                  | 1632 (23.9%)                          | 36 (16.1%)                        |                          |
| 2+                                                                  | 473 (33.9%)                            | 11 (35.5%)                        |                  | 2595 (38%)                            | 86 (38.6%)                        |                          |

|                                                                      |             |            |         |              |             |         |
|----------------------------------------------------------------------|-------------|------------|---------|--------------|-------------|---------|
| <b>Number of outpatient encounters in the year before index date</b> |             |            |         |              |             |         |
| <10                                                                  | 449 (32.2%) | 4 (12.9%)  | 0.0227  | 2008 (29.4%) | 25 (11.2%)  | <0.0001 |
| 10+                                                                  | 947 (67.8%) | 27 (87.1%) |         | 4816 (70.6%) | 198 (88.8%) |         |
| <b>Comorbidities</b>                                                 |             |            |         |              |             |         |
| Myocardial infarction                                                | 187 (13.4%) | 4 (12.9%)  | 0.9366  | 1089 (16%)   | 37 (16.6%)  | 0.7994  |
| Congestive heart failure                                             | 461 (33%)   | 8 (25.8%)  | 0.3975  | 2515 (36.9%) | 87 (39%)    | 0.5111  |
| Cerebrovascular disease                                              | 171 (12.2%) | 1 (3.2%)   | 0.1269  | 996 (14.6%)  | 20 (9%)     | 0.0186  |
| Peripheral vascular disease                                          | 931 (66.7%) | 22 (71%)   | 0.617   | 4652 (68.2%) | 171 (76.7%) | 0.0071  |
| Moderate or severe liver disease                                     | 18 (1.3%)   | 1 (3.2%)   | 0.3522  | 116 (1.7%)   | 4 (1.8%)    | 0.9151  |
| Malignancy                                                           | 221 (15.8%) | 7 (22.6%)  | 0.3104  | 1174 (17.2%) | 45 (20.2%)  | 0.2477  |
| Renal disease                                                        | 570 (40.8%) | 15 (48.4%) | 0.3975  | 2902 (42.5%) | 88 (39.5%)  | 0.3622  |
| COPD                                                                 | 679 (48.6%) | 18 (58.1%) | 0.2991  | 3385 (49.6%) | 133 (59.6%) | 0.0032  |
| Dementia                                                             | 169 (12.1%) | 1 (3.2%)   | 0.1311  | 834 (12.2%)  | 17 (7.6%)   | 0.0381  |
| AIDS/HIV                                                             | 2 (0.1%)    | 0 (0%)     | 0.833   | 22 (0.3%)    | 1 (0.4%)    | 0.7454  |
| <b>Diabetes</b>                                                      |             |            |         |              |             |         |
| Diabetes with A1c $\geq$ 7.5                                         | 225 (16.1%) | 3 (9.7%)   | 0.7935  | 1078 (15.8%) | 20 (9%)     | 0.005   |
| Diabetes with A1c<7.5                                                | 450 (32.2%) | 11 (35.5%) |         | 2331 (34.2%) | 67 (30%)    |         |
| Diabetes with unknown A1c                                            | 32 (2.3%)   | 1 (3.2%)   |         | 147 (2.2%)   | 5 (2.2%)    |         |
| No diabetes diagnosis                                                | 689 (49.4%) | 16 (51.6%) |         | 3268 (47.9%) | 131 (58.7%) |         |
| <b>RSV Result</b>                                                    |             |            |         |              |             |         |
| Negative                                                             | 775 (55.5%) | 29 (93.5%) | <0.0001 | 6203 (90.9%) | 221 (99.1%) | <0.0001 |
| Positive                                                             | 621 (44.5%) | 2 (6.5%)   |         | 621 (9.1%)   | 2 (0.9%)    |         |
| <b>Encounter setting</b>                                             |             |            |         |              |             |         |
| Hospitalization                                                      | 679 (48.6%) | 13 (41.9%) | 0.4601  | 3910 (57.3%) | 114 (51.1%) | 0.0667  |
| Emergency Department                                                 | 717 (51.4%) | 18 (58.1%) |         | 2914 (42.7%) | 109 (48.9%) |         |
| <b>Immunocompromised</b>                                             |             |            |         |              |             |         |
| No                                                                   | 1201 (86%)  | 26 (83.9%) | 0.7318  | 5861 (85.9%) | 188 (84.3%) | 0.5046  |
| Yes                                                                  | 195 (14%)   | 5 (16.1%)  |         | 963 (14.1%)  | 35 (15.7%)  |         |

## eReferences

1. Rozenbaum MH, Judy J, Tran D, Yacisin K, Kurosky SK, Begier E. Low Levels of RSV Testing Among Adults Hospitalized for Lower Respiratory Tract Infection in the United States. *Infect Dis Ther.* Feb 2023;12(2):677-685. doi:10.1007/s40121-023-00758-5
