# Supplementary material for: Estimated Vaccine Effectiveness for Respiratory Syncytial Virus–Related Lower Respiratory Tract Disease
Source: PubMed Central journal article supplement — JAMA Netw Open. 2024 Dec 13;7(12):e2450832. doi: 10.1001/jamanetworkopen.2024.50832 (PMC11645642; doi:10.1001/jamanetworkopen.2024.50832), 2024-12-13
Supplement: jamanetwopen-e2450832-s002.pdf [file jamanetwopen-e2450832-s002.pdf]

## Data Sharing Statement

Tartof. Estimated Vaccine Effectiveness and Respiratory Syncytial Virus–Related Lower Respiratory Tract Disease. *JAMA Netw Open*. Published December 13, 2024.

doi:10.1001/jamanetworkopen.2024.50832

### Data

**Data available:** No

### Additional Information

**Explanation for why data not available:** Anonymized data that support the findings of this study may be made available from the investigative team in the following conditions: (1) agreement to collaborate with the study team on all publications, (2) provision of external funding for administrative and investigator time necessary for this collaboration, (3) demonstration that the external investigative team is qualified and has documented evidence of training for human subjects protections, and (4) agreement to abide by the terms outlined in data use agreements between institutions.
